# Supplementary material for: Interhospital Transfer Before Thrombectomy Is Associated With Delayed Treatment and Worse Outcome in the STRATIS Registry (Systematic Evaluation of Patients Treated With Neurothrombectomy Devices for Acute Ischemic Stroke)
Source: PubMed Central journal article supplement (PMC5732640; doi:10.1161/circulationaha.117.028920), 2017-12-11
Supplement: cir-136-2311-s001.pdf [file cir-136-2311-s001.pdf]

# **SUPPLEMENTAL MATERIAL**

**Interhospital transfer prior to thrombectomy is associated with delayed treatment and worse outcome in the STRATIS registry**

Supplemental Table I. STRATIS Hospital Characteristics

| Site # | Hospital Name                                                            | City         | State | Geographic Type <sup>a</sup> | Stroke Center Type <sup>b</sup> | Certifying Body <sup>b</sup> | STRATIS enrollment direct | STRATIS enrollment transfer | STRATIS total enrollment | # Beds <sup>a</sup> | Volume of tPA 2015 <sup>a</sup> | Volume of MT Procedures 2015 <sup>a</sup> |
|--------|--------------------------------------------------------------------------|--------------|-------|------------------------------|---------------------------------|------------------------------|---------------------------|-----------------------------|--------------------------|---------------------|---------------------------------|-------------------------------------------|
| 101    | OHSU Marquam Hill Campus                                                 | Portland     | OR    | Urban                        | Comprehensive                   | Joint Commission             | 5                         | 28                          | 33                       | 564                 | 14                              | 37                                        |
| 102    | Ruby Memorial Hospital                                                   | Morgantown   | WV    | Urban                        | Primary                         | Joint Commission             | 6                         | 0                           | 6                        | 455                 | 89                              | 29                                        |
| 103    | Jackson Memorial Hospital                                                | Miami        | FL    | Urban                        | Comprehensive                   | Joint Commission             | 48                        | 10                          | 58                       | 1450                | 75                              | 55                                        |
| 104    | Baptist Health Lexington                                                 | Lexington    | KY    | Urban                        | Primary                         | Joint Commission             | 28                        | 5                           | 33                       | 360                 | 47                              | 77                                        |
| 105    | Maine Medical Center                                                     | Portland     | ME    | Urban                        | Primary                         | Joint Commission             | 10                        | 6                           | 16                       | 611                 | 43                              | 58                                        |
| 106    | Cleveland Clinic                                                         | Cleveland    | OH    | Urban                        | Comprehensive                   | Joint Commission             | 2                         | 15                          | 17                       | 1258                | 45                              | 70                                        |
| 107    | Providence St Vincent Medical Center                                     | Portland     | OR    | Urban                        | Comprehensive                   | Joint Commission             | 15                        | 11                          | 26                       | 526                 | 56                              | 25                                        |
| 108    | Presence St. Joseph Medical Center/ Presence Resurrection Medical Center | Chicago      | IL    | Urban                        | Primary                         | Joint Commission             | 6                         | 5                           | 11                       | 432 / 200           | 27 / 13                         | 31/24                                     |
| 109    | Brigham and Women's Hospital                                             | Boston       | MA    | Urban                        | Primary                         | State of Mass                | 5                         | 26                          | 31                       | 763                 | 13                              | 27                                        |
| 110    | Buffalo General Medical Center                                           | Buffalo      | NY    | Urban                        | Comprehensive                   | Det Norske Veritas (DNV)     | 6                         | 0                           | 6                        | 942                 | 113                             | 111                                       |
| 111    | Saint Lukes Hospital of Kansas City                                      | Kansas City  | MO    | Urban                        | Comprehensive                   | Joint Commission             | 14                        | 21                          | 35                       | 387                 | 33                              | 111                                       |
| 112    | Baptist Medical Center Jacksonville                                      | Jacksonville | FL    | Urban                        | Primary                         | Joint Commission             | 6                         | 7                           | 13                       | 867                 | 48                              | 85                                        |
| 113    | Grady Memorial Hospital                                                  | Atlanta      | GA    | Urban                        | Comprehensive                   | Joint Commission             | 20                        | 44                          | 64                       | 639                 | 68                              | 346                                       |
| 114    | Florida Hospital Orlando                                                 | Orlando      | FL    | Urban                        | Primary                         | Det Norske Veritas (DNV)     | 46                        | 17                          | 63                       | 2393                | 132                             | 127                                       |
| 115    | Memorial Hermann-Texas Medical Center                                    | Houston      | TX    | Urban                        | Comprehensive                   | Joint Commission             | 5                         | 3                           | 8                        | 931                 | 151                             | 49                                        |
| 116    | WellStar Kennestone Regional Medical Center                              | Marietta     | GA    | Urban                        | Comprehensive                   | Joint Commission             | 38                        | 15                          | 53                       | 552                 | 92                              | 156                                       |

| Site # | Hospital Name                                                               | City                                   | State | Geographic Type <sup>a</sup> | Stroke Center Type <sup>b</sup> | Certifying Body <sup>b</sup> | STRATIS enrollment direct | STRATIS enrollment transfer | STRATIS total enrollment | # Beds <sup>a</sup> | Volume of tPA 2015 <sup>a</sup> | Volume of MT Procedures 2015 <sup>a</sup> |
|--------|-----------------------------------------------------------------------------|----------------------------------------|-------|------------------------------|---------------------------------|------------------------------|---------------------------|-----------------------------|--------------------------|---------------------|---------------------------------|-------------------------------------------|
| 117    | Crouse Hospital                                                             | Syracuse                               | NY    | Urban                        | Primary                         | State of New York            | 4                         | 0                           | 4                        | 487                 | 52                              | 67                                        |
| 118    | Ohio Health Research Institute                                              | Columbus                               | OH    | Urban                        | Comprehensive                   | Joint Commission             | 6                         | 9                           | 15                       | 671                 | 35                              | 78                                        |
| 119    | Advocate Christ Medical Center / Advocate Lutheran General Hospital         | Chicago                                | IL    | Urban                        | Primary                         | Det Norske Veritas (DNV)     | 5                         | 8                           | 13                       | 580 / 530           | 27 / 31                         | 41 / 43                                   |
| 120    | University of Massachusetts Medical Hospital                                | Worcester                              | MA    | Urban                        | Primary                         | State of Mass                | 4                         | 1                           | 5                        | 572                 | 56                              | 35                                        |
| 121    | Mercy San Juan Medical Center                                               | Sacramento                             | CA    | Urban                        | Comprehensive                   | Joint Commission             | 4                         | 5                           | 9                        | 370                 | 65                              | 105                                       |
| 122    | Houston Methodist Hospital                                                  | Houston                                | TX    | Urban                        | Comprehensive                   | Det Norske Veritas (DNV)     | 11                        | 2                           | 13                       | 914                 | 63                              | 46                                        |
| 123    | Palmetto General Hospital/ Delray Medical Center/ St. Mary's Medical Center | Hialeah/ Delray Beach/ West Palm Beach | FL    | Urban                        | Comprehensive                   | Joint Commission             | 53                        | 18                          | 71                       | 360 / 347 / 374     | 61 / 52 / 101                   | 63 / 63 / 12 / 82                         |
| 125    | Froedtert Hospital                                                          | Milwaukee                              | WI    | Urban                        | Comprehensive                   | Joint Commission             | 2                         | 2                           | 4                        | 508                 | 30                              | 54                                        |
| 126    | Norton Hospital                                                             | Louisville                             | KY    | Urban                        | Comprehensive                   | Joint Commission             | 26                        | 31                          | 57                       | 1362                | 34                              | 118                                       |
| 127    | Barnes - Jewish Hospital South                                              | St. Louis                              | MO    | Urban                        | Comprehensive                   | Joint Commission             | 3                         | 8                           | 11                       | 1206                | 63                              | 994                                       |
| 128    | Valley Baptist Medical Center                                               | Harlingen                              | TX    | Urban                        | Primary                         | Det Norske Veritas (DNV)     | 18                        | 21                          | 39                       | 378                 | 28                              | 111                                       |
| 129    | Ascension St John Hospital/ Providence Hospital and Medical Center          | Detroit / Southfield                   | MI    | Urban                        | Primary                         | Joint Commission             | 1                         | 2                           | 3                        | 573 / 575           | 34 / 29                         | 20 / 25                                   |
| 130    | Aurora St Lukes Medical Center                                              | Milwaukee                              | WI    | Urban                        | Comprehensive                   | Joint Commission             | 0                         | 7                           | 7                        | 882                 | 53                              | 33                                        |
| 131    | University Of Kentucky Hospital - Albert B Chandler Hospital                | Lexington                              | KY    | Urban                        | Comprehensive                   | Joint Commission             | 3                         | 4                           | 7                        | 829                 | 58                              | 56                                        |
| 132    | Memorial Regional Hospital                                                  | Hollywood                              | FL    | Urban                        | Primary                         | Joint Commission             | 29                        | 1                           | 30                       | 909                 | 31                              | 46                                        |

| Site # | Hospital Name                                   | City          | State | Geographic Type <sup>a</sup> | Stroke Center Type <sup>b</sup> | Certifying Body <sup>b</sup> | STRATIS enrollment direct | STRATIS enrollment transfer | STRATIS total enrollment | # Beds <sup>a</sup> | Volume of tPA 2015 <sup>a</sup> | Volume of MT Procedures 2015 <sup>a</sup> |
|--------|-------------------------------------------------|---------------|-------|------------------------------|---------------------------------|------------------------------|---------------------------|-----------------------------|--------------------------|---------------------|---------------------------------|-------------------------------------------|
| 133    | Ronald Reagan UCLA Medical Center               | Los Angeles   | CA    | Urban                        | Comprehensive                   | Joint Commission             | 13                        | 8                           | 21                       | 452                 | 21                              | 32                                        |
| 134    | Banner University Medical Center Tucson         | Tucson        | AZ    | Urban                        | Primary                         | Joint Commission             | 6                         | 2                           | 8                        | 479                 | 24                              | <11                                       |
| 135    | McLaren Flint                                   | Flint         | MI    | Urban                        | Comprehensive                   | Joint Commission             | 1                         | 3                           | 4                        | 284                 | 40                              | 18                                        |
| 136    | Virginia Mason Medical Center                   | Seattle       | WA    | Urban                        | Primary                         | Joint Commission             | 1                         | 2                           | 3                        | 236                 | <11                             | <11                                       |
| 137    | Geisinger Medical Center                        | Danville      | PA    | Urban                        | Primary                         | Joint Commission             | 4                         | 5                           | 9                        | 504                 | 37                              | 13                                        |
| 138    | St. Dominic - Jackson Memorial Hospital         | Jackson       | MS    | Urban                        | Comprehensive                   | Joint Commission             | 10                        | 8                           | 18                       | 535                 | 44                              | 47                                        |
| 139    | Baylor University Medical Center                | Dallas        | TX    | Urban                        | Comprehensive                   | Det Norske Veritas (DNV)     | 8                         | 6                           | 14                       | 850                 | 55                              | 22                                        |
| 141    | University of Maryland Medical Center           | Baltimore     | MD    | Urban                        | Comprehensive                   | Joint Commission             | 1                         | 8                           | 9                        | 711                 | 20                              | 33                                        |
| 142    | ProMedica Toledo Hospital                       | Toledo        | OH    | Urban                        | Comprehensive                   | Joint Commission             | 0                         | 2                           | 2                        | 654                 | 30                              | 85                                        |
| 143    | Baptist Hospital of Miami                       | Miami         | FL    | Urban                        | Comprehensive                   | Joint Commission             | 9                         | 6                           | 15                       | 705                 | 68                              | 63                                        |
| 144    | Los Robles Hospital and Medical Center          | Thousand Oaks | CA    | Urban                        | Primary                         | Det Norske Veritas (DNV)     | 3                         | 1                           | 4                        | 294                 | 11                              | 77                                        |
| 145    | Baptist Health Louisville                       | Louisville    | KY    | Urban                        | Primary                         | Joint Commission             | 8                         | 2                           | 10                       | 468                 | 48                              | 18                                        |
| 146    | Albany Medical Center                           | Albany        | NY    | Urban                        | Primary                         | Joint Commission             | 2                         | 3                           | 5                        | 683                 | 17                              | 61                                        |
| 147    | Swedish Medical Center - Cherry Hill            | Seattle       | WA    | Urban                        | Primary                         | Det Norske Veritas (DNV)     | 1                         | 12                          | 13                       | 170                 | 34                              | 53                                        |
| 148    | Abbott Northwestern Hospital                    | Minneapolis   | MN    | Urban                        | Comprehensive                   | Det Norske Veritas (DNV)     | 1                         | 0                           | 1                        | 579                 | 37                              | 44                                        |
| 149    | Erlanger Baroness Hospital                      | Chattanooga   | TN    | Urban                        | Comprehensive                   | Joint Commission             | 2                         | 0                           | 2                        | 606                 | 87                              | 182                                       |
| 150    | University of California, Irvine Medical Center | Irvine        | CA    | Urban                        | Comprehensive                   | Joint Commission             | 3                         | 0                           | 3                        | 349                 | 56                              | 26                                        |

| Site # | Hospital Name                                              | City          | State | Geographic Type <sup>a</sup> | Stroke Center Type <sup>b</sup> | Certifying Body <sup>b</sup> | STRATIS enrollment direct | STRATIS enrollment transfer | STRATIS total enrollment | # Beds <sup>a</sup> | Volume of tPA 2015 <sup>a</sup> | Volume of MT Procedures 2015 <sup>a</sup> |
|--------|------------------------------------------------------------|---------------|-------|------------------------------|---------------------------------|------------------------------|---------------------------|-----------------------------|--------------------------|---------------------|---------------------------------|-------------------------------------------|
| 151    | California Pacific Medical Center - Davies Campus Hospital | San Francisco | CA    | Urban                        | Primary                         | Joint Commission             | 0                         | 1                           | 1                        | 146                 | <11                             | 93                                        |
| 152    | University of Tennessee Medical Center                     | Knoxville     | TN    | Urban                        | Comprehensive                   | Joint Commission             | 8                         | 6                           | 14                       | 599                 | 36                              | 42                                        |
| 154    | UPMC Presbyterian ShadySide                                | Pittsburgh    | PA    | Urban                        | Comprehensive                   | Joint Commission             | 24                        | 26                          | 50                       | 1173                | 38                              | 167                                       |
| 155    | Vanderbilt University Medical Center                       | Nashville     | TN    | Urban                        | Comprehensive                   | Joint Commission             | 3                         | 5                           | 8                        | 890                 | 59                              | 70                                        |
| 157    | Banner - University Medical Center Phoenix                 | Phoenix       | AZ    | Urban                        | Primary                         | Joint Commission             | 1                         | 2                           | 3                        | 643                 | 47                              | 51                                        |
| 158    | Mayo Clinic Hospital                                       | Rochester     | MN    | Urban                        | Comprehensive                   | Joint Commission             | 1                         | 4                           | 5                        | 1079                | 18                              | 48                                        |
| 159    | Carolinas HealthCare - Carolinas Medical Center            | Charlotte     | NC    | Urban                        | Primary                         | Joint Commission             | 0                         | 1                           | 1                        | 1030                | 44                              | 25                                        |

<sup>a</sup>Source: Definitive Healthcare-based on data from all payers in 2015: Volume of tPA is defined as stroke patients who received tPA with no further treatment for stroke (ICD9 code 43300, 43301, 43310, 43311, 43320, 43321, 43330, 43331, 43380, 43381, 43390, 43391, 43400, 43401, 43410, 43411, 43490, 43491, ICD10 163.x, 166.x and DRG 061,062,063); Volume of MT procedures (ICD9 Procedure code 3974)

<sup>b</sup>Stroke center type information obtained from the following:

1. DNV Healthcare Introduces Comprehensive Stroke Center Certification. DNV GL Healthcare. <http://dnvglhealthcare.com/releases/dnv-healthcare-introduces-comprehensive-stroke-center-certification>. Accessed January 30, 2017.
2. The Joint Commission Quality Check. The Joint Commission. <https://www.qualitycheck.org/data-download/certification-data-download/>. Accessed January 30, 2017.
3. New York State Department of Health, NYS Health Profiles. [https://profiles.health.ny.gov/hospital/designated\\_centers/Stroke+Center](https://profiles.health.ny.gov/hospital/designated_centers/Stroke+Center). Accessed January 30, 2017.
4. Commonwealth of Massachusetts, Executive Office of Health and Human Service. <http://www.mass.gov/eohhs/gov/departments/dph/programs/hcq/healthcare-quality/health-care-facilities/hospitals/stroke-services/designated-primary-stroke-services-hospitals.html>. Accessed January 30, 2017.
